# Supplementary material
Source: PubMed Central journal article supplement (PMC4456926)
Supplement: supp_tpc.114.135939_tpc135939_SupplementalData.pdf [file supp_tpc.114.135939_tpc135939_SupplementalData.pdf]

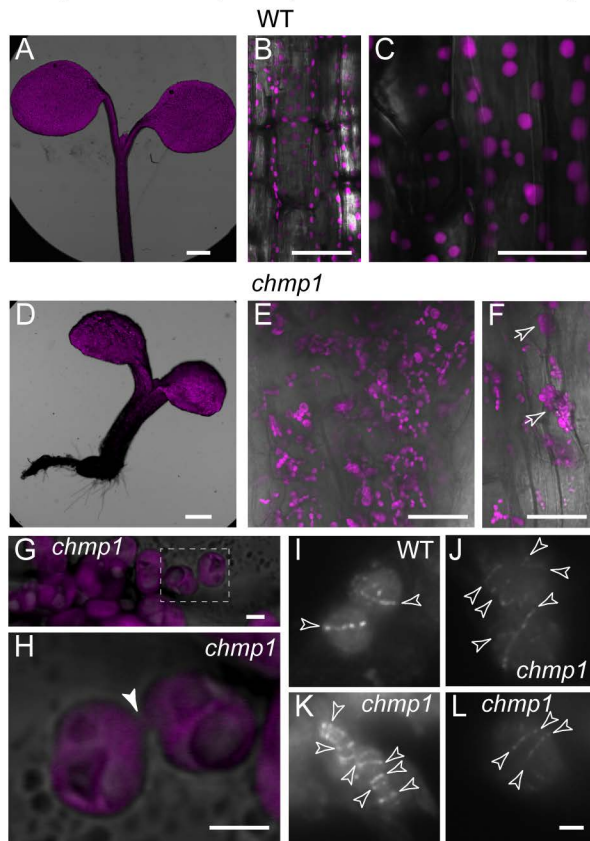

**Supplemental Figure 1.** Plastid Defects in *chmp1* Mutant Seedlings.

(A) to (F) Imaging of chlorophyll autofluorescence (magenta) at the hypocotyl of WT and *chmp1a chmp1b* mutant seedlings.

(G) and (H) Detail of a mutant plastid cluster and a connecting plastid bridge (arrowhead).

(I) to (L) Immunofluorescence detection of FTSZ2 rings (arrowheads) in WT and *chmp1a chmp1b* mutant seedlings.

Bars: 500  $\mu$ m in (A) and (D), 50  $\mu$ m in (B), (C), (E), (F), 2  $\mu$ m in (G) to (L).

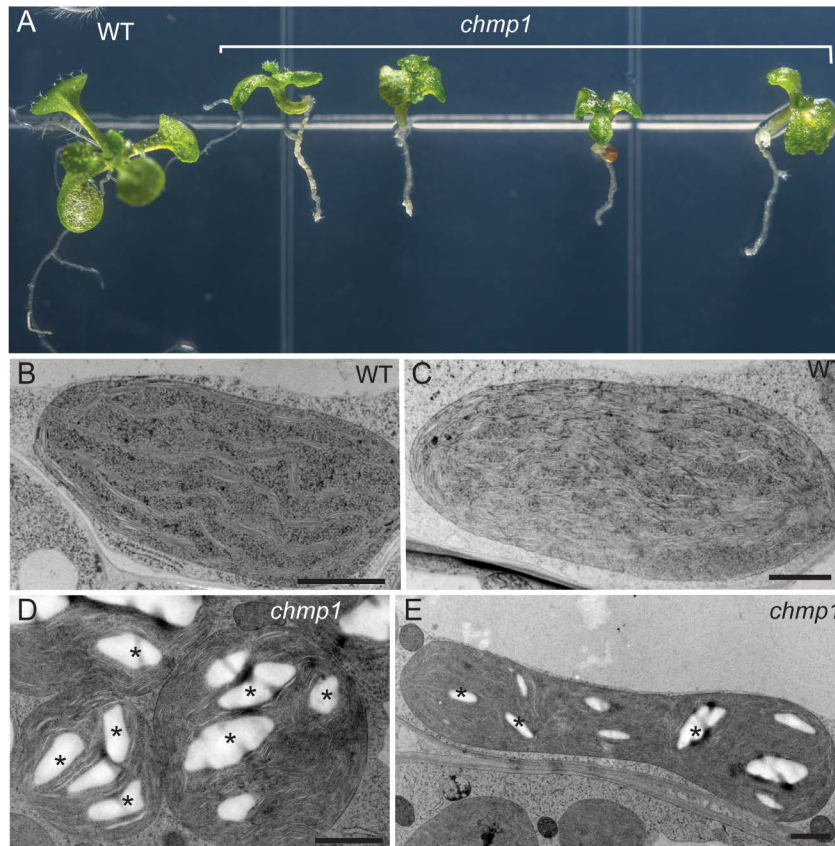

**Supplemental Figure 2.** Seedling Morphology and Chloroplast Ultrastructure.

**(A)** Twelve-day-old WT and *chmp1* seedlings.

**(B) to (E)** High-pressure frozen/freeze substituted cotyledons from WT and *chmp1* seedlings. The *chmp1* chloroplasts accumulate large starch granules (asterisks) but show normal organization of thylakoid membranes.

Bars: 1 μm.

## MEX1-YFP in WT embryo cells

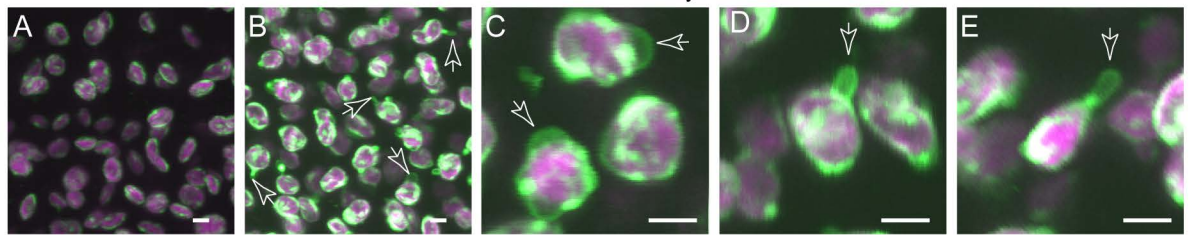MEX1-YFP in *chmp1* embryo cells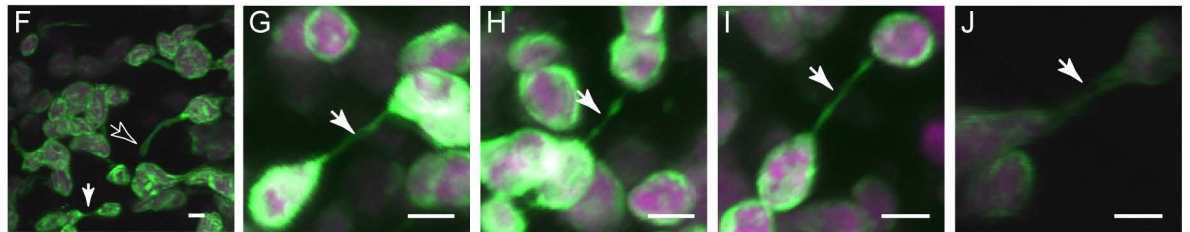

## RECA-GFP in WT root hairs

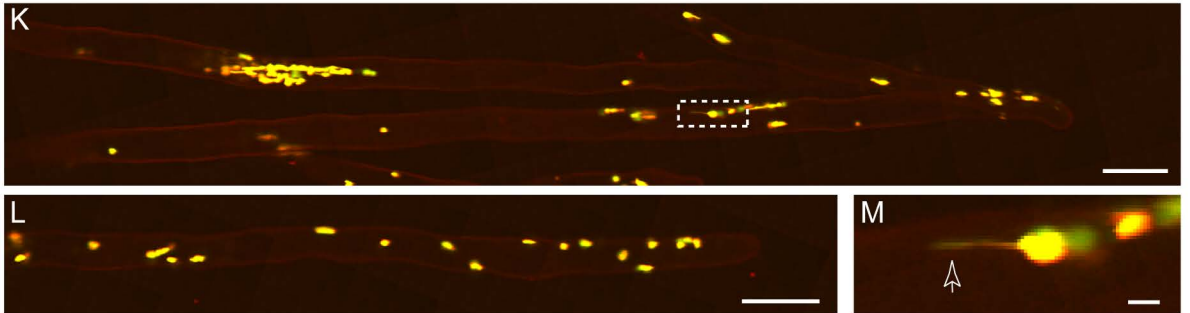RECA-GFP in *chmp1* root hairs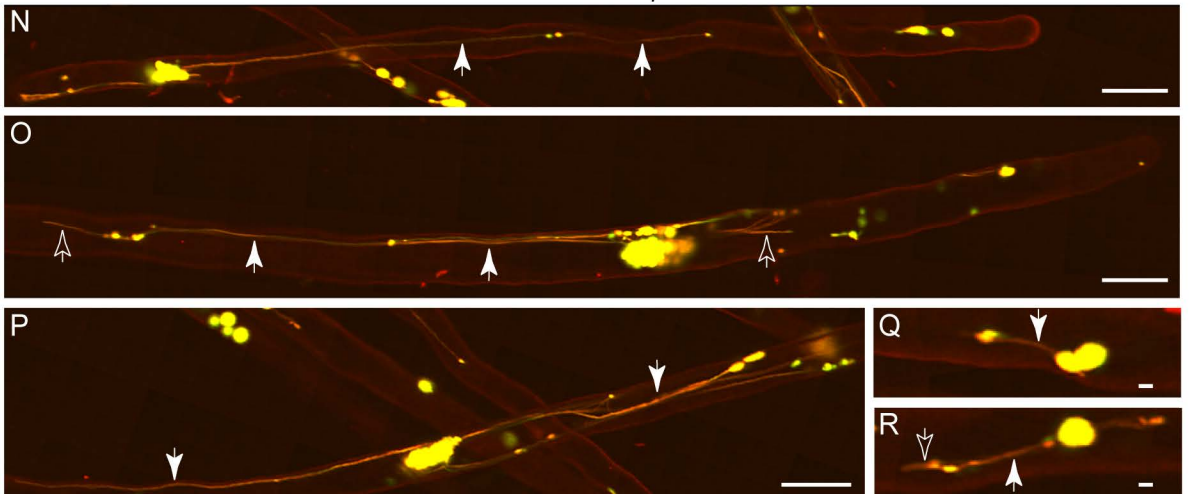

**Supplemental Figure 3.** Abnormal Plastid Morphology in *chmp1* Embryos and Root Cells. **(A) to (E)** Embryo cells expressing the inner envelope marker MEX1-YFP. Chlorophyll autofluorescence in magenta. **(K) to (R)** Root hairs stained with propidium iodide (red) and expressing the stroma marker RECA-GFP (green). Yellow denotes overlap of both signals. Open arrows indicate stromules and plastid extensions and closed arrows show interconnecting plastid bridges. Boxed region in **(K)** is shown at higher magnification in **(M)**. Bars = 2  $\mu$ m in **(A) to (J), (M), (Q), (R)**, 20  $\mu$ m in **(K), (L), (N) to (P)**.

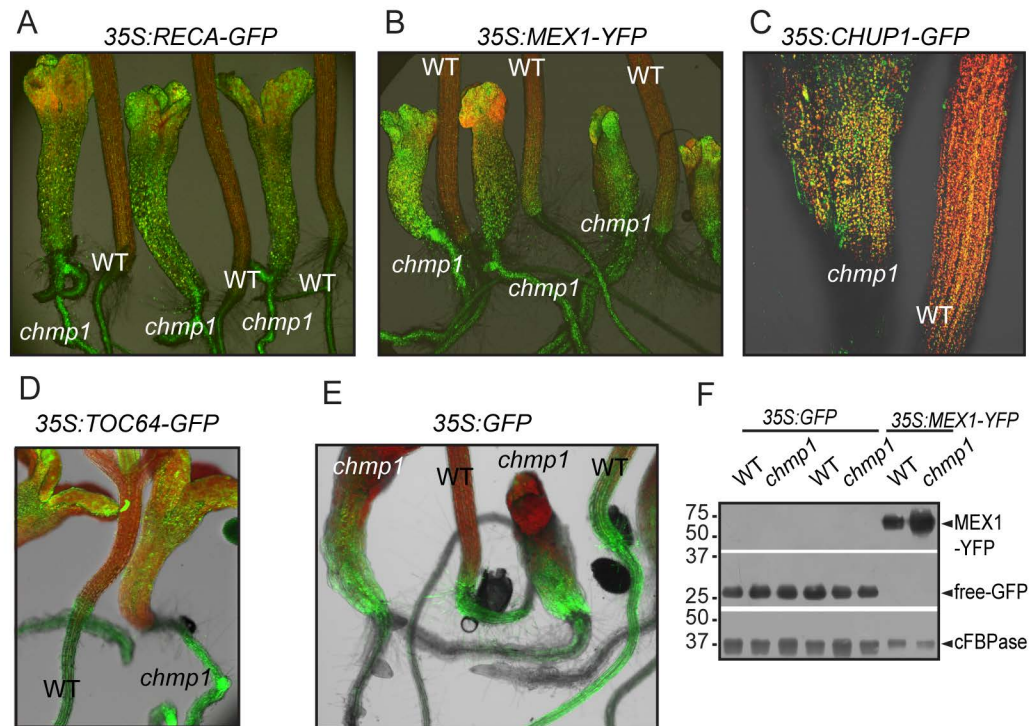

**Supplemental Figure 4.** Protein Expression in WT and *chmp1* seedlings. **(A)** to **(E)** Confocal imaging of control and *chmp1* mutant seedlings expressing RECA-GFP, MEX1-YFP, CHUP1-GFP, TOC64-GFP, and cytosolic GFP under the control of *CaMV35S*. Chlorophyll autofluorescence is shown in red. Note that the signals from fluorescently-tagged plastid proteins but not from cytosolic GFP are stronger in *chmp1* than in WT seedlings.

**(F)** Immunoblot detection with anti-GFP antibodies indicates that MEX1-YFP but not cytosolic GFP accumulate at higher levels in the *chmp1* mutant compared to control seedlings. Cytoplasmic FBPase was used as loading control. Densitometric analysis of this immunoblot is shown in Supplemental Table 1.

Supplemental Table 1: Densitometric quantification of western blots shown in Figure 2 and Supplemental Figure 3.

|                   | <b>WT</b> |          | <b><i>chmp1</i></b> |          | Fold increase |
|-------------------|-----------|----------|---------------------|----------|---------------|
|                   | Average   | Std Dev  | Average             | Std Dev  |               |
| Mex1/FBPase ratio | 1.190032  | 0.617486 | 3.642005            | 1.333038 | 3.060426      |
| Tic110/cFBPase    | 0.217453  | 0.041303 | 1.067541            | 0.375686 | 4.909298      |
| Toc75/cFBPase     | 0.201725  | 0.58522  | 1.302932            | 0.58522  | 6.458938      |
| PsbA-D1/cFBPase   | 1.472533  | 0.239303 | 1.605705            | 0.57613  | 1.090437      |
| FtsZ2/cFBPase     | 0.336573  | 0.105448 | 2.875513            | 1.731814 | 8.543514      |
| PEX14/cFBPase     | 0.149051  | 0.016022 | 0.648455            | 0.137086 | 4.350569      |
| VDAC/cFBPase      | 0.455402  | 0.042822 | 1.7901              | 0.172553 | 3.930815      |
| GFP/cFBPase       | 0.666119  | 0.053307 | 0.961918            | 0.094021 | 1.444063      |

|                | <b>WT 6d</b> |         | <b>WT 12d</b> |         | <b><i>chmp1</i> 12d</b> |         |
|----------------|--------------|---------|---------------|---------|-------------------------|---------|
|                | Average      | Std Dev | Average       | Std Dev | Average                 | Std Dev |
| Tic110/cFBPase | 0.31         | 0.18    | 0.31          | 0.16    | 0.72                    | 0.18    |
| TIC110/PBA1    | 0.60         | 0.43    | 0.57          | 0.28    | 1.09                    | 0.1     |
| TIC110/H3      | 0.54         | 0.31    | 0.63          | 0.34    | 1.14                    | 0.42    |
| PDV2/ cFBPase  | 0.11         | 0.05    | 0.12          | 0.05    | 0.72                    | 0.36    |
| PDV2/PBA1      | 0.21         | 0.08    | 0.22          | 0.10    | 1.18                    | 0.69    |
| PDV2/H3        | 0.19         | 0.08    | 0.21          | 0.09    | 1.0                     | 0.46    |
| PSAF/ cFBPase  | 1.15         | 0.19    | 1.08          | 0.17    | 1.19                    | 0.10    |
| PSAF/PBA1      | 2.14         | 0.41    | 2.01          | 0.47    | 1.67                    | 0.33    |
| PSAF/H3        | 1.88         | 0.03    | 1.99          | 0.32    | 1.63                    | 0.14    |

Supplemental Table 2: Densitometric quantification of western blot shown in Figure 4N

|                                                     | <i>chmp1</i>    |                 | WT              |                 |
|-----------------------------------------------------|-----------------|-----------------|-----------------|-----------------|
|                                                     | N               | no N            | N               | no N            |
| Free GFP                                            | 9665.267        | 39082.63        | 6196.832        | 20976.07        |
| GFP-ATG8                                            | 6990.196        | 17216.87        | 7056.368        | 6347.711        |
| GFP/ATG8-GFP ratio                                  | 1.382689        | 2.270019        | 0.87819         | 3.304509        |
| Fold increase of GFP/ATG8-GFP ratio upon starvation |                 | <b>1.641742</b> |                 | <b>3.762863</b> |
| cFBPase                                             | 17172.67        | 20295.24        | 30688.47        | 18005.72        |
|                                                     |                 |                 |                 |                 |
| Free GFP/cFBPase                                    | 0.562828        | 1.925704        | 0.201927        | 1.164967        |
| GFP-ATG8/cFBPase                                    | 0.407053        | 0.848321        | 0.229935        | 0.352539        |
| Total GFP + GFP-ATG8                                | <b>0.969882</b> | <b>2.774025</b> | <b>0.431862</b> | <b>1.517505</b> |
